# Supplementary material
Source: ML conference proceedings conference paper supplement (https://proceedings.mlr.press/v97/lee19e.html)
Supplement: Supplementary file 1 [file lee19e-supp.pdf]

---

# Supplementary Materials for “First-Order Algorithms Converge Faster than $O(1/k)$ on Convex Problems”

---

Ching-pei Lee<sup>1</sup> Stephen J. Wright<sup>1</sup>

## A. Proof of Lemma 1

*Proof.* The proof uses simplified elements of the proofs of Lemmas 2 and 9 of Section 2.2.1 from (Polyak, 1987). Define  $s_k := k\Delta_k$  and  $u_k := s_k + \sum_{i=k}^{\infty} \Delta_i$ . Note that

$$s_{k+1} = (k+1)\Delta_{k+1} \leq k\Delta_k + \Delta_{k+1} \leq s_k + \Delta_k. \quad (1)$$

From (1) we have

$$\begin{aligned} u_{k+1} &= s_{k+1} + \sum_{i=k+1}^{\infty} \Delta_i \leq s_k + \Delta_k + \sum_{i=k+1}^{\infty} \Delta_i \\ &= s_k + \sum_{i=k}^{\infty} \Delta_i = u_k, \end{aligned}$$

so that  $\{u_k\}$  is a monotonically decreasing nonnegative sequence. Thus there is  $u \geq 0$  such that  $u_k \rightarrow u$ , and since  $\lim_{k \rightarrow \infty} \sum_{i=k}^{\infty} \Delta_i = 0$ , we have  $s_k \rightarrow u$  also.

Assuming for contradiction that  $u > 0$ , there exists  $k_0 > 0$  such that  $s_k \geq u/2 > 0$  for all  $k \geq k_0$ , so that  $\Delta_k \geq u/(2k)$  for all  $k \geq k_0$ . This contradicts the summability of  $\{\Delta_k\}$ . Therefore we have  $u = 0$ , so that  $k\Delta_k = s_k \rightarrow 0$ , proving the result.  $\square$

## References

Polyak, B. T. *Introduction to Optimization*. Translation Series in Mathematics and Engineering, 1987.

---

<sup>1</sup>Department of Computer Sciences and Wisconsin Institute for Discovery, University of Wisconsin-Madison, Madison, Wisconsin, USA. Correspondence to: Ching-pei Lee <ching-pei@cs.wisc.edu>, Stephen J. Wright <swright@cs.wisc.edu>.
